# Supplementary material
Source: PubMed Central journal article supplement (PMC2612090)
Supplement: NIHMS75964-supplement-Suppl__1.pdf [file NIHMS75964-supplement-Suppl__1.pdf]

## Supporting Online Materials

### **Human adenylate kinase 2 deficiency causes a profound haematopoietic defect associated with sensorineural deafness**

Chantal Lagresle-Peyrou <sup>1,2,3,18</sup>, Emmanuelle M. Six <sup>1,2,18</sup>, Capucine Picard <sup>1,2,4,5</sup>, Frédéric Rieux-Laucat <sup>1,2</sup>, Vincent Michel <sup>6</sup>, Andrea Ditadi <sup>1,2</sup>, Corinne Demerens-de Chappedelaine <sup>1,2</sup>, Estelle Morillon <sup>1,2</sup>, Françoise Valensi <sup>1</sup>, Karen L. Simon-Stoos <sup>7</sup>, James C. Mullikin <sup>8</sup>, Lenora M. Noroski <sup>9</sup>, Céline Besse <sup>10</sup>, Nicolas M. Wulffraat <sup>11</sup>, Alina Ferster <sup>12</sup>, Manuel M. Abecasis<sup>13</sup>, Fabien Calvo <sup>14</sup>, Christine Petit <sup>6,15</sup>, Fabio Candotti <sup>8</sup>, Laurent Abel <sup>2,5,19</sup>, Alain Fischer <sup>1,2,16,19</sup>, Marina Cavazzana-Calvo <sup>1,2,17</sup>

**Supplementary Table 1: Candidate region corresponding to the 2Mb genomic interval on human chromosome 1p32-1p34 and containing the adenylate kinase 2 gene.**

| start           | stop            | Symbol       | location      | description                                                           |
|-----------------|-----------------|--------------|---------------|-----------------------------------------------------------------------|
| 32146380        | 32176575        | PTP4A2       | 1p35          | protein tyrosine phosphatase type IVA, member 2                       |
| 32252078        | 32282059        | KHDRBS1      | 1p32          | KH domain containing, RNA binding, signal transduction associated     |
| 32311116        | 32341052        | TMEM39B      | 1p35.1        | transmembrane protein 39B                                             |
| 32346231        | 32414756        | KPNA6        | 1p35.1-p34.3  | karyopherin alpha 6 (importin alpha 7)                                |
| 32417932        | 32436473        | TXLNA        | 1p35.1        | taxilin alpha                                                         |
| 32438789        | 32443578        | CCDC28B      | 1p35.1        | coiled-coil domain containing 28B                                     |
| 32443708        | 32446980        | LOC100128669 | 1p35.1        | hypothetical protein LOC100128669                                     |
| 32443859        | 32446875        | IQCC         | 1p36.11-p34.2 | IQ motif containing C                                                 |
| 32447282        | 32454384        | DCDC2B       | 1p35.1        | doublecortin domain containing 2B                                     |
| 32454385        | 32460513        | C1orf91      | 1p36.11-p34.2 | chromosome 1 open reading frame 91                                    |
| 32460558        | 32469792        | EIF3I        | 1p34.1        | eukaryotic translation initiation factor 3, subunit I                 |
| 32469846        | 32479779        | LOC339483    | 1p35.1        | hypothetical LOC339483                                                |
| 32485405        | 32487048        | C1orf90      | 1p35.1        | chromosome 1 open reading frame 90                                    |
| 32489427        | 32524353        | LCK          | 1p34.3        | lymphocyte-specific protein tyrosine kinase                           |
| 32530295        | 32571811        | HDAC1        | 1p34          | histone deacetylase 1                                                 |
| 32572027        | 32574410        | MARCKSL1     | 1p35.1        | MARCKS-like 1                                                         |
| 32597776        | 32600431        | LOC100128071 | 1p35.1        | similar to hCG41624                                                   |
| 32600449        | 32602513        | TSSK3        | 1p35-p34      | testis-specific serine kinase 3                                       |
| 32603359        | 32632614        | BSDC1        | 1p35.1        | BSD domain containing 1                                               |
| 32640303        | 32642909        | LOC343338    | 1p35.1        | similar to Glyceraldehyde-3-phosphate dehydrogenase (GAPDH)           |
| 32661399        | 32662353        | LOC100131615 | 1p35.1        | hypothetical LOC100131615                                             |
| 32662452        | 32665767        | LOC100133117 | 1p35.1        | hypothetical LOC100133117                                             |
| 32694834        | 32726047        | RP1-2705.1   | 1p35.1        | zinc finger and BTB domain containing 8-like                          |
| 32777359        | 32844129        | ZBTB8        | 1p35.1        | zinc finger and BTB domain containing 8                               |
| 32859892        | 32888772        | ZBTB8OS      | 1p35.1        | zinc finger and BTB domain containing 8 opposite strand               |
| 32889411        | 32918841        | RBBP4        | 1p35.1        | retinoblastoma binding protein 4                                      |
| 32918548        | 32933460        | SYNC1        | 1p34.3-p33    | syncoilin, intermediate filament 1                                    |
| 32980099        | 33013158        | KIAA1522     | 1p35.1        | KIAA1522                                                              |
| 33013427        | 33056220        | YARS         | 1p35.1        | tyrosyl-tRNA synthetase                                               |
| 33055763        | 33097063        | S100PBP      | 1p35.1        | S100P binding protein                                                 |
| 33100464        | 33108934        | FNDC5        | 1p35.1        | fibronectin type III domain containing 5                              |
| 33124685        | 33132834        | HPCA         | 1p35-p34.2    | hippocalcin                                                           |
| 33125700        | 33132004        | LOC100129200 | 1p35.1        | hypothetical protein LOC100129200                                     |
| 33132783        | 33139540        | TMEM54       | 1p35-p34      | transmembrane protein 54                                              |
| 33174634        | 33202301        | RNF19B       | 1p35.1        | ring finger protein 19B                                               |
| 33218133        | 33218831        | LOC127545    | 1p35.1        | hCG1641703                                                            |
| <b>33246173</b> | <b>33275079</b> | <b>AK2</b>   | <b>1p34</b>   | <b>adenylate kinase 2</b>                                             |
| 33319301        | 33358582        | ADC          | 1p33-p34.3    | arginine decarboxylase                                                |
| 33383591        | 33419854        | TRIM62       | 1p35.1        | tripartite motif-containing 62                                        |
| 33494761        | 33538907        | ZNF362       | 1p35.1        | zinc finger protein 362                                               |
| 33544954        | 33559286        | A3GALT2      | 1p35.1        | alpha 1,3-galactosyltransferase 2 (isoglobotriaosylceramide synthase) |
| 33561811        | 33613781        | PHC2         | 1p34.3        | polyhomeotic homolog 2 (Drosophila)                                   |
| 33704437        | 33707163        | LOC100131451 | 1p35.1        | hypothetical LOC100131451                                             |
| 33710819        | 33734582        | ZSCAN20      | 1p34.3        | zinc finger and SCAN domain containing 20                             |
| 33750191        | 33756426        | LOC100132171 | 1p35.1        | hypothetical LOC100132171                                             |
| 33752196        | 34404030        | CSMD2        | 1p35.1-p34.3  | CUB and Sushi multiple domains 2                                      |
| 34098663        | 34102979        | HMGB4        | 1p35.1        | high-mobility group box 4                                             |
| 34415858        | 34457319        | C1orf94      | 1p34.3        | chromosome 1 open reading frame 94                                    |

## Supplementary Table 2: Primers sequences used for RT-PCR analysis and shRNA constructs

### RT-PCR primers

AK2 FWD 5'-AACTGGTGGCAGTGAGAGAC-3'

REV 5'-TGCTGAATTCAATCACAGAA-3'

28S FWD 5'-ATAAGCGCCTCTCGGTTTTG-3'

REV 5'-GCTCCTTGATGTGTTCTGGT-3'

### shRNA primers used for cloning into pLVTHM

shAK2: containing target sequences (in bold) from AK2 cDNA at position 232-250.

FWD

5'**CGCGTCCCATGGTAGTGGAGCTCATTGTTCAAGAGACAATGAGCTCCACTACC**  
**ATTTTTTGGAAAT3'**

REV

5'**CGATTTCCAAAAATGGTAGTGGAGCTCATTGTCTCTTGAACAATGAGCT**  
**CCACTACCATGGGGA3'**

ShScramble : containing a scramble version of the AK2 target sequence.

FWD

5'**CGCGTCCCCGACTCGGGTAGTTTATGGATTCAAGAGATCCATAAACTACCCGAG**  
**TCTTTTTGGAAAT3'**

REV

5'**CGATTTCCAAAAAGACTCGGGTAGTTTATGGATCTCTTGAATCCATAAAC**  
**TACCCGAGTCGGGGA3'**
