# Supplementary material
Source: PubMed Central journal article supplement (PMC2612090)
Supplement: NIHMS75964-supplement-Suppl__2.pdf [file NIHMS75964-supplement-Suppl__2.pdf]

# Supplementary Figure 1

## Conservation of the AK2 protein sequence in various orthologs

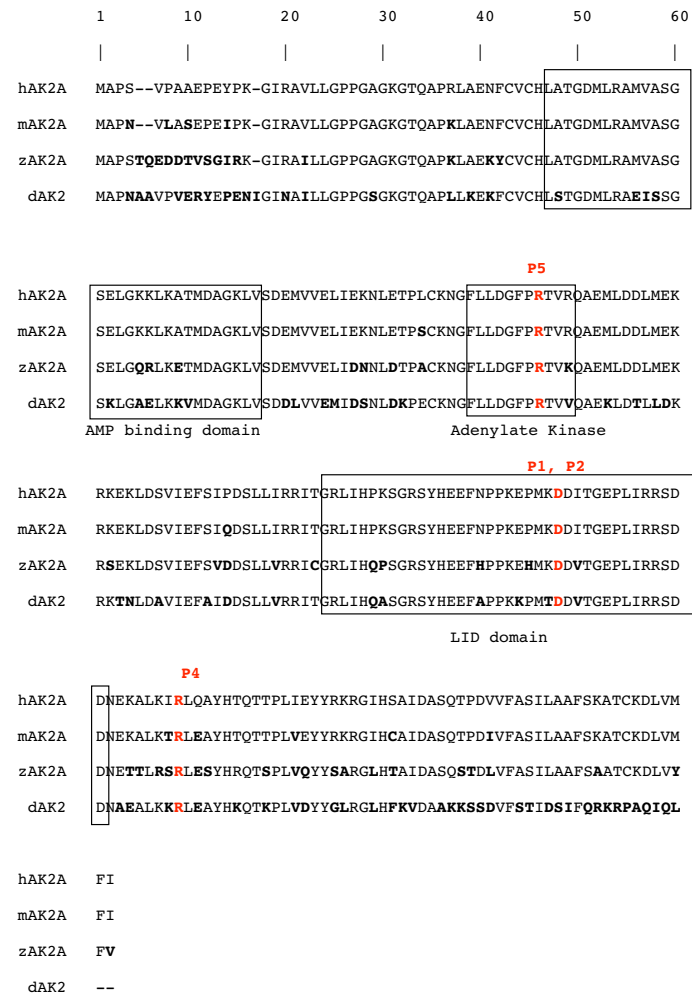

Alignment of human AK2 (hAK2), murine AK2 (mAK2), zebrafish AK2 (zAK2) and drosophila AK2 (dAK2) protein sequences. Amino acids affected by a mutation are denoted in red.

## Supplementary Figure 2

### Phenotype of bone marrow cells from an RD patient

**a**

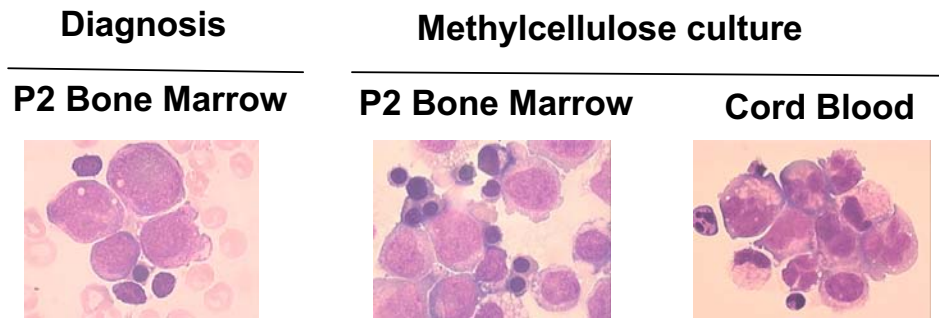

**b**

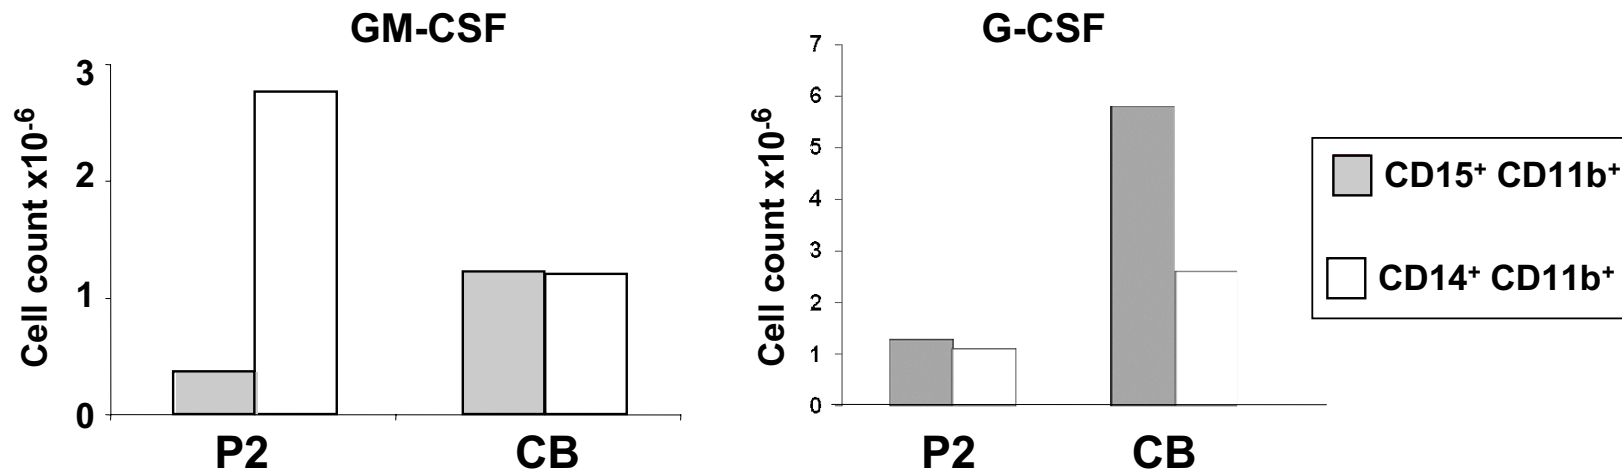

(a) May-Grünwald/Giemsa staining of BM cells from patient P2 at diagnosis (left panel) and after methylcellulose culture (right panel). In both conditions, only a few myeloblast cells could be identified. In the control cord blood (CB) culture, myeloid precursors and polynuclear cells were detected.

(b) Granulocyte and monocyte differentiation of patient P2's BM cells. CD34<sup>+</sup> cells isolated from patient P2's BM or from control cord blood (CB) cells were cultured in the presence of SCF, FLT-3L and GM-CSF (all at 100ng/ml) or G-CSF (100ng/ml) for 2 weeks. At the end of the culture, flow cytometry analysis was performed to determine the proportion of neutrophils (CD15<sup>+</sup> CD11b<sup>+</sup>) and monocytes (CD14<sup>+</sup> CD11b<sup>+</sup>).

### Supplementary Figure 3

#### AK2 gene expression profile in bone marrow haematopoietic subpopulations

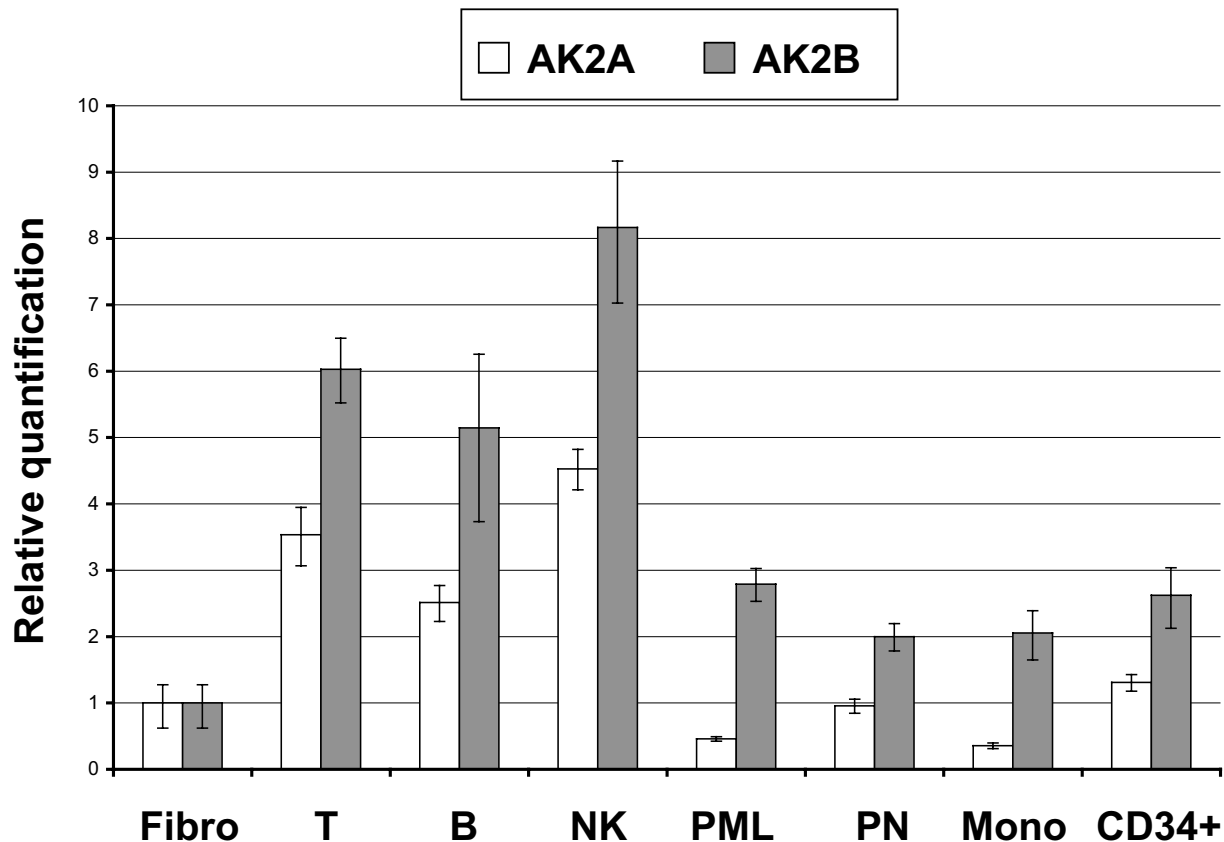

AK2A and AK2B expression were quantified by real-time RT-PCR in various bone marrow haematopoietic populations as compared to a SV40-transformed fibroblast cell line (Fibro). The cell populations analyzed were sorted by flow cytometry to isolate : CD3<sup>+</sup> T-cell (T), CD19<sup>+</sup> B-cell (B), CD16<sup>+</sup>CD56<sup>+</sup> NK-cell (NK), CD34<sup>+</sup> progenitors (CD34), CD15<sup>+</sup>CD11b<sup>-</sup> promyelocytes (PML), CD15<sup>+</sup>CD11b<sup>+</sup> polynucleated neutrophils (PN) and CD14<sup>+</sup> monocytes (Mono). Data correspond to the mean of two independent adult bone marrow-derived populations.

## Supplementary Figure 4

### Complementation of the neutrophil differentiation defect by restoration of *AK2* expression in P6 BM cells

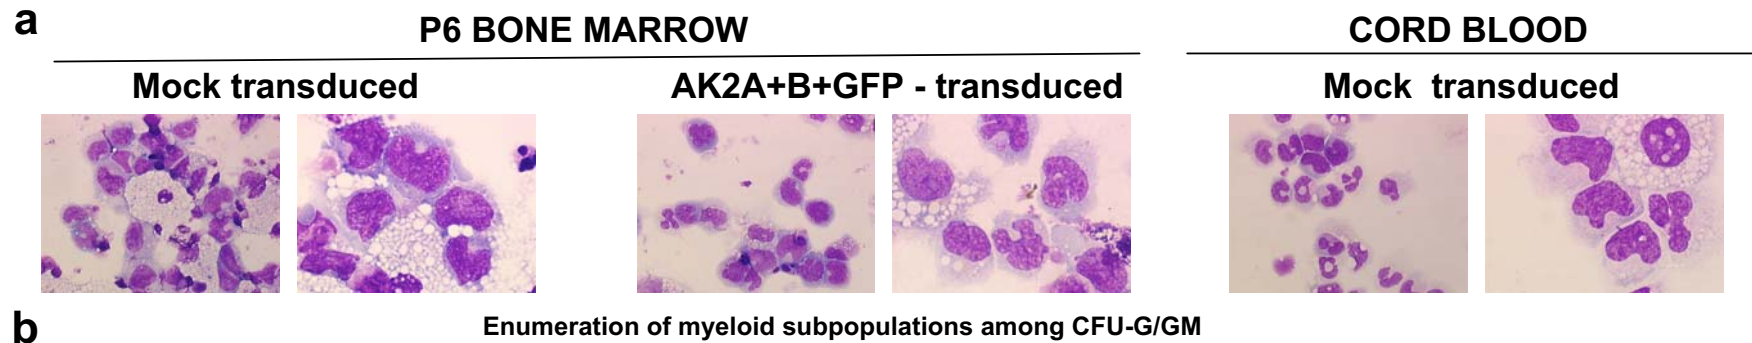

**b**

Enumeration of myeloid subpopulations among CFU-G/GM

|                                     |                 |      | P6 BM<br>Mock | P6 BM<br>AK2A+B+GFP | CB<br>Mock |
|-------------------------------------|-----------------|------|---------------|---------------------|------------|
| <b>Myeloid precursors</b>           | %               |      | 99            | 80                  | 35         |
|                                     | Absolute number | cell | 127,700       | 494,600             | 51,400     |
| <b>Differentiated myeloid cells</b> | %               |      | 1             | 20                  | 65         |
|                                     | Absolute number | cell | 1,300         | 123,700             | 95,500     |

Mononuclear cells isolated from the bone marrow (BM) of patient P6 were transduced with either two bicistronic lentivirus vectors (encoding *AK2A* and *AK2B*, together with GFP : *AK2A+B+GFP*) or mock transduced. Mock transduced cord-blood-derived CD34<sup>+</sup> cells were used as a positive control. After lentiviral transduction, 250,000 mononuclear cells from P6's BM were seeded in semi-solid medium for each condition. As a control experiment, 1,000 CD34<sup>+</sup> cord blood cells were seeded in semi-solid medium.

(a) After 13 days, CFU-G/GM colonies were collected and cytopspin preparations were analyzed by May-Grunwald/Giemsa staining. Representative pictures of various stages of neutrophil maturation are shown at magnifications of 50x (left panel) or 100x (right panel).

(b) Enumeration of myeloid subpopulations among CFU-G/GM colonies. Myeloid precursors (blasts, myeloblasts and promyelocytes) and differentiated myeloid cells (myelocytes, metamyelocytes and granulocytes) are represented in percentage and in absolute cell numbers.

## Supplementary Figure 5

### Inhibition of neutrophil differentiation after AK2 knock-down

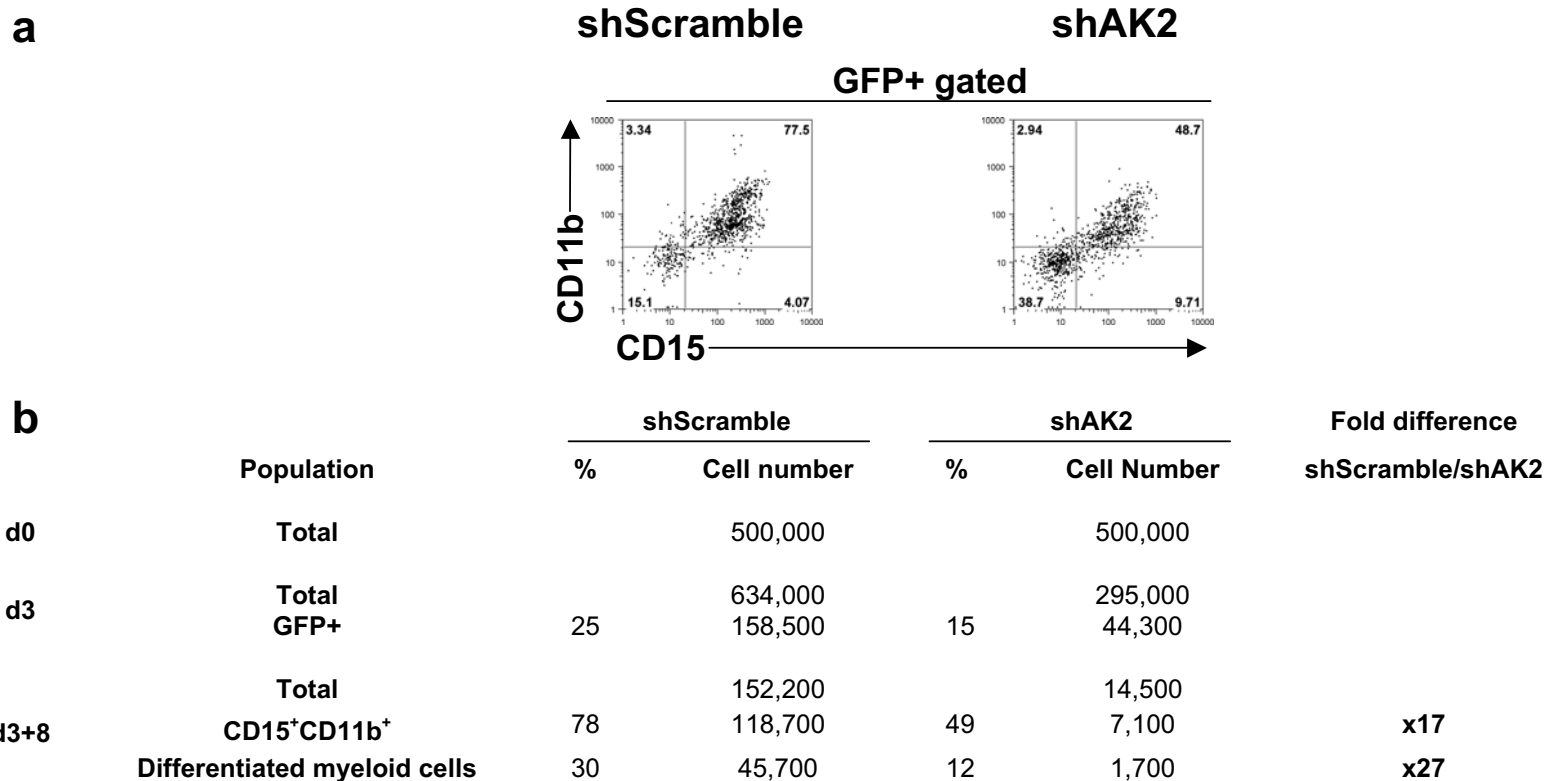

CD34<sup>+</sup> CB progenitors were transduced three times with a lentivirus encoding GFP together with a shRNA directed against AK2 (shAK2) or with a shRNA corresponding to a scramble version as a control (shScramble). At day 3 (d3), the transduced GFP positive cells were sorted and culture in the presence of G-CSF. Eight days later (d3+8), we evaluated neutrophil differentiation (CD15<sup>+</sup>CD11b<sup>+</sup> count) by flow cytometry analysis (**a**). These results were combined with the analysis of May-Grunwald/Giemsa cytopsin preparations. Using both flow cytometry and morphological analysis, we enumerated respectively the absolute numbers of mature granulocytes CD15<sup>+</sup>CD11b<sup>+</sup> as well as differentiated myeloid cells (myelocytes, metamyelocytes, granulocytes) obtained in both shScramble and shAK2 conditions (**b**).
